# Supplementary material
Source: Springer Nature journal article supplement (https://www.springermedizin.de/resource/supplementary/12899_2010_168_MOESM11_ESM.pdf/9514586)

**A**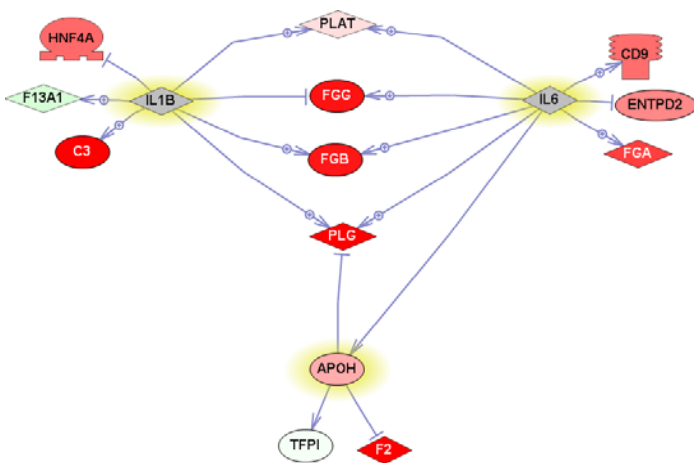

zebrafish

**B**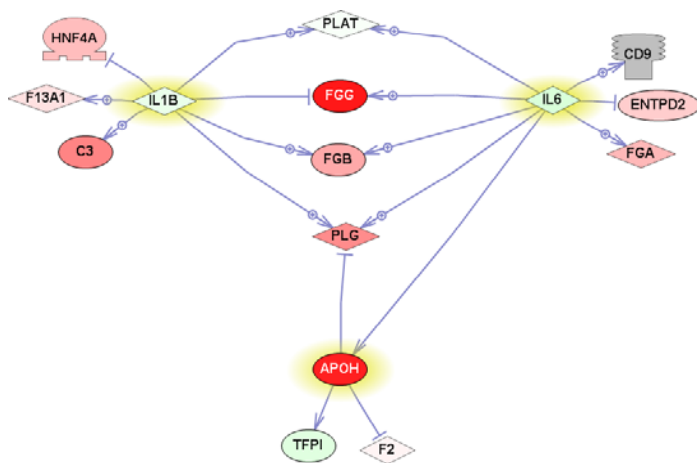

rat

**C**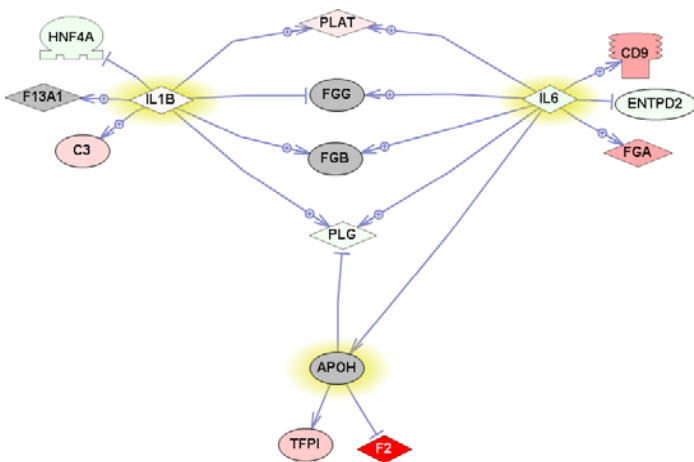

mouse

**D**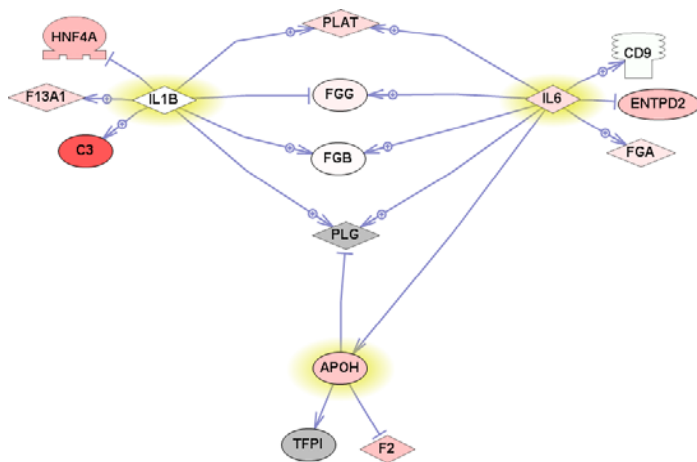

human

Log<sub>2</sub> (obesity/control)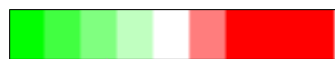

-2 -1 0 1 2

Supplement: MOESM11 [file 9514586]
